# Supplementary material for: Secondary Somatic Mutations Restoring RAD51C and RAD51D Associated with Acquired Resistance to the PARP Inhibitor Rucaparib in High-Grade Ovarian Carcinoma
Source: Oxford University Press journal article supplement (doi:10.1158/2159-8290.cd-17-0419), 2017-06-06
Supplement: 21598290cd170419-sup-182124_1_supp_4061189_zqzz1m.xlsx [file 21598290cd170419-sup-182124_1_supp_4061189_zqzz1m.xlsx]

## Sheet: Supplementary Table 1
SUBJECT ID	SAMPLE TYPE	VARIANT-TYPE	GENE	SV-PROTEIN-CHANGE	SV-CDS-CHANGE	SV-GENOME-POSITION	SV-COVERAGE	SV-PERCENT-READS	CNA-COPY-NUMBER	CNA-EXONS	CNA-RATIO	CNA-TYPE	REARR-GENE1	REARR-GENE2	REARR-DESCRIPTION	REARR-IN-FRAME?	REARR-POS1	REARR-POS2	REARR-NUMBER-OF-READS
1	Archival	short-variant	TP53	R213*	637C>T	chr17:7578212	1227	49	-	-	-	-	-	-	-	-	-	-	-
1	Archival	short-variant	BRCA1	L392fs*5	1174_1213delCTGTTAGGTTCTGATGACTCACATGATGGGGAGTCTGAAT	chr17:41246334	897	67	-	-	-	-	-	-	-	-	-	-	-
1	Archival	copy-number-alteration	KDM5A	-	-	-	-	-	8	28 of 28	1.59	amplification	-	-	-	-	-	-	-
1	Archival	copy-number-alteration	MYC	-	-	-	-	-	11	5 of 5	2.03	amplification	-	-	-	-	-	-	-
1	Archival	rearrangement	ATR	-	-	-	-	-	-	-	-	-	ATR	ATR	duplication	unknown	chr3:142272370-142272492	chr3:142262285-142262550	29
1	Pre-treatment	short-variant	TP53	R213*	637C>T	chr17:7578212	968	78	-	-	-	-	-	-	-	-	-	-	-
1	Pre-treatment	short-variant	BRCA1	L392fs*5	1174_1213delCTGTTAGGTTCTGATGACTCACATGATGGGGAGTCTGAAT	chr17:41246334	855	84	-	-	-	-	-	-	-	-	-	-	-
1	Pre-treatment	short-variant	NF1	splice	1260_1260+432del433	chr17:29528503	166	26	-	-	-	-	-	-	-	-	-	-	-
1	Pre-treatment	copy-number-alteration	KDM5A	-	-	-	-	-	8	28 of 28	2.08	amplification	-	-	-	-	-	-	-
1	Pre-treatment	copy-number-alteration	MYC	-	-	-	-	-	8	5 of 5	2.53	amplification	-	-	-	-	-	-	-
1	Pre-treatment	rearrangement	ATR	-	-	-	-	-	-	-	-	-	ATR	ATR	duplication	unknown	chr3:142272343-142272492	chr3:142262282-142262518	48
1	Pre-treatment	rearrangement	NOTCH3	-	-	-	-	-	-	-	-	-	NOTCH3	NOTCH3	duplication	unknown	chr19:15288187-15288367	chr19:15275357-15275571	24
1	Post-progression	short-variant	TP53	R213*	637C>T	chr17:7578212	1008	73.81	-	-	-	-	-	-	-	-	-	-	-
1	Post-progression	short-variant	BRCA1	L392fs*5	1175_1214del40	chr17:41246333	991	67.71	-	-	-	-	-	-	-	-	-	-	-
1	Post-progression	short-variant	BRCA1	S377_N417del	1129_1251del123	chr17:41246296	1388	30.91	-	-	-	-	-	-	-	-	-	-	-
1	Post-progression	copy-number-alteration	KDM5A	-	-	-	-	-	9	28 of 28	2.06	amplification	-	-	-	-	-	-	-
1	Post-progression	copy-number-alteration	MYC	-	-	-	-	-	12	5 of 5	2.79	amplification	-	-	-	-	-	-	-
1	Post-progression	rearrangement	ATR	-	-	-	-	-	-	-	-	-	ATR	ATR	duplication	unknown	chr3:142272342-142272492	chr3:142262283-142262583	107
2	Archival	short-variant	TP53	T155N	464C>A	chr17:7578466	530	12	-	-	-	-	-	-	-	-	-	-	-
2	Archival	short-variant	BRCA1	W1782*	5346G>A	chr17:41201198	524	57	-	-	-	-	-	-	-	-	-	-	-
2	Pre-treatment	short-variant	TP53	T155N	464C>A	chr17:7578466	631	61	-	-	-	-	-	-	-	-	-	-	-
2	Pre-treatment	short-variant	BRCA1	W1782*	5346G>A	chr17:41201198	542	77	-	-	-	-	-	-	-	-	-	-	-
2	Post-progression	short-variant	TP53	T155N	464C>A	chr17:7578466	692	49	-	-	-	-	-	-	-	-	-	-	-
2	Post-progression	short-variant	BRCA1	W1782*	5346G>A	chr17:41201198	534	70	-	-	-	-	-	-	-	-	-	-	-
3	Archival	short-variant	TP53	R273H	818G>A	chr17:7577120	182	89	-	-	-	-	-	-	-	-	-	-	-
3	Archival	short-variant	BRCA1	L631fs*4	1892_1893delTA	chr17:41245654	246	80	-	-	-	-	-	-	-	-	-	-	-
3	Archival	copy-number-alteration	AKT1	-	-	-	-	-	8	13 of 13	3.48	amplification	-	-	-	-	-	-	-
3	Pre-treatment	short-variant	TP53	R273H	818G>A	chr17:7577120	635	29	-	-	-	-	-	-	-	-	-	-	-
3	Pre-treatment	short-variant	BRCA1	L631fs*4	1892_1893delTA	chr17:41245654	796	33	-	-	-	-	-	-	-	-	-	-	-
3	Pre-treatment	short-variant	PIK3R1	splice site 1426-1G>A	1426-1G>A	chr5:67590363	491	32	-	-	-	-	-	-	-	-	-	-	-
3	Post-progression	short-variant	TP53	R273H	818G>A	chr17:7577120	748	10	-	-	-	-	-	-	-	-	-	-	-
3	Post-progression	short-variant	BRCA1	S425_C712>S	1275_2135del861	chr17:41245412	1215	7	-	-	-	-	-	-	-	-	-	-	-
3	Post-progression	short-variant	BRCA1	L631fs*4	1892_1893delTA	chr17:41245654	1108	10	-	-	-	-	-	-	-	-	-	-	-
3	Post-progression	short-variant	EGFR	P373R	1118C>G	chr7:55224337	1177	51	-	-	-	-	-	-	-	-	-	-	-
3	Post-progression	short-variant	PIK3R1	splice site 1426-1G>A	1426-1G>A	chr5:67590363	842	9	-	-	-	-	-	-	-	-	-	-	-
3	Post-progression	copy-number-alteration	FGF12	-	-	-	-	-	9	6 of 6	1.59	amplification	-	-	-	-	-	-	-
4	Archival	short-variant	TP53	C176F	527G>T	chr17:7578403	453	42	-	-	-	-	-	-	-	-	-	-	-
4	Archival	short-variant	BRCA1	N682fs*1	2042_2043insT	chr17:41245505	768	73	-	-	-	-	-	-	-	-	-	-	-
4	Archival	copy-number-alteration	NF1	-	-	-	-	-	0	59 of 59	0.44	loss	-	-	-	-	-	-	-
4	Post-progression	short-variant	TP53	C176F	527G>T	chr17:7578403	427	39	-	-	-	-	-	-	-	-	-	-	-
4	Post-progression	short-variant	BRCA1	splice site 4096+1G>A	4096+1G>A	chr17:41243451	742	9	-	-	-	-	-	-	-	-	-	-	-
4	Post-progression	short-variant	BRCA1	N682fs*1	2042_2043insT	chr17:41245505	870	74	-	-	-	-	-	-	-	-	-	-	-
4	Post-progression	short-variant	BRCA1	R612fs*46	1834_1963del130	chr17:41245584	823	15	-	-	-	-	-	-	-	-	-	-	-
4	Post-progression	copy-number-alteration	NF1	-	-	-	-	-	0	59 of 59	0.47	loss	-	-	-	-	-	-	-
5	Archival	short-variant	CTCF	R120*	358C>T	chr16:67655479	267	10	-	-	-	-	-	-	-	-	-	-	-
5	Archival	short-variant	RAD51C	R193*	577C>T	chr17:56780562	656	92	-	-	-	-	-	-	-	-	-	-	-
5	Archival	short-variant	TP53	E51fs*5	151_152delGA	chr17:7579534	279	73	-	-	-	-	-	-	-	-	-	-	-
5	Archival	copy-number-alteration	MYC	-	-	-	-	-	7	3 of 3	2.36	amplification	-	-	-	-	-	-	-
5	Pre-treatment	short-variant	ARID2	Q1165*	3493C>T	chr12:46245399	717	17	-	-	-	-	-	-	-	-	-	-	-
5	Pre-treatment	short-variant	RAD51C	R193*	577C>T	chr17:56780562	711	73	-	-	-	-	-	-	-	-	-	-	-
5	Pre-treatment	short-variant	TP53	E51fs*5	151_152delGA	chr17:7579534	680	35	-	-	-	-	-	-	-	-	-	-	-
5	Pre-treatment	copy-number-alteration	CCNE1	-	-	-	-	-	8	10 of 10	1.42	amplification	-	-	-	-	-	-	-
5	Pre-treatment	copy-number-alteration	FLT4	-	-	-	-	-	8	31 of 31	1.4	amplification	-	-	-	-	-	-	-
5	Pre-treatment	copy-number-alteration	RICTOR	-	-	-	-	-	7	39 of 39	1.35	amplification	-	-	-	-	-	-	-
5	Pre-treatment	copy-number-alteration	MYC	-	-	-	-	-	9	5 of 5	1.8	amplification	-	-	-	-	-	-	-
5	Post-progression	short-variant	RAD51C	R193*	577C>T	chr17:56780562	1050	63	-	-	-	-	-	-	-	-	-	-	-
5	Post-progression	short-variant	RAD51C	R193W	577_579CGA>TGG	chr17:56780562	1050	10	-	-	-	-	-	-	-	-	-	-	-
5	Post-progression	short-variant	RAD51C	R193R (silent)	577C>A	chr17:56780562	1050	7	-	-	-	-	-	-	-	-	-	-	-
5	Post-progression	short-variant	RAD51C	H192_R193>GG	574_577CACC>GGCG	chr17:56780559	1021	3	-	-	-	-	-	-	-	-	-	-	-
5	Post-progression	short-variant	RAD51C	R193L	577_578CG>TT	chr17:56780562	1050	2	-	-	-	-	-	-	-	-	-	-	-
5	Post-progression	short-variant	ARID2	Q1165*	3493C>T	chr12:46245399	996	33	-	-	-	-	-	-	-	-	-	-	-
5	Post-progression	short-variant	TP53	E51fs*5	151_154GAAC>AA	chr17:7579534	714	66	-	-	-	-	-	-	-	-	-	-	-
5	Post-progression	copy-number-alteration	MYC	-	-	-	-	-	7	5 of 5	2.39	amplification	-	-	-	-	-	-	-
5	Post-progression	rearrangement	LRP1B	-	-	-	-	-	-	-	-	-	LRP1B	LRP1B	deletion	unknown	chr2:141660534-141660788	chr2:141043959-141044108	12
6	Archival	short-variant	TP53	G266R	796G>A	chr17:7577142	371	90	-	-	-	-	-	-	-	-	-	-	-
6	Archival	short-variant	NF1	splice site 5269-2A>T	5269-2A>T	chr17:29654515	461	82	-	-	-	-	-	-	-	-	-	-	-
6	Archival	short-variant	RB1	N290fs*11	869_869delA	chr13:48939036	590	79	-	-	-	-	-	-	-	-	-	-	-
6	Archival	short-variant	RAD51L3	G146fs*50	434_440delGCGGGAG	chr17:33428346	247	89	-	-	-	-	-	-	-	-	-	-	-
6	Post-progression_spleen	short-variant	TP53	G266R	796G>A	chr17:7577142	603	86	-	-	-	-	-	-	-	-	-	-	-
6	Post-progression_spleen	short-variant	NF1	splice site 5269-2A>T	5269-2A>T	chr17:29654515	631	87	-	-	-	-	-	-	-	-	-	-	-
6	Post-progression_spleen	short-variant	RB1	N290fs*11	869_869delA	chr13:48939036	1386	83	-	-	-	-	-	-	-	-	-	-	-
6	Post-progression_spleen	short-variant	RAD51L3	S145_R147>K	433_440AGCGGGAG>AA	chr17:33428348	418	90	-	-	-	-	-	-	-	-	-	-	-
6	Post-progression_liver	short-variant	TP53	G266R	796G>A	chr17:7577142	686	6	-	-	-	-	-	-	-	-	-	-	-
6	Post-progression_liver	short-variant	NF1	splice site 5269-2A>T	5269-2A>T	chr17:29654515	959	8	-	-	-	-	-	-	-	-	-	-	-
6	Post-progression_liver	short-variant	RAD51L3	G146fs*50	434_440delGCGGGAG	chr17:33428346	558	46	-	-	-	-	-	-	-	-	-	-	-
7	Archival	short-variant	RB1	W195*	585G>A	chr13:48923137	350	75	-	-	-	-	-	-	-	-	-	-	-
7	Archival	short-variant	CDK12	F89fs*3	264_264delC	chr17:37618587	901	83	-	-	-	-	-	-	-	-	-	-	-
7	Archival	short-variant	TP53	G154_R156del	459_467delCGGCACCCG	chr17:7578462	728	83	-	-	-	-	-	-	-	-	-	-	-
7	Archival	copy-number-alteration	CDK6	-	-	-	-	-	7	7 of 7	3.18	amplification	-	-	-	-	-	-	-
7	Pre-treatment	short-variant	RB1	W195*	585G>A	chr13:48923137	469	33	-	-	-	-	-	-	-	-	-	-	-
7	Pre-treatment	short-variant	CDK12	F89fs*3	264_264delC	chr17:37618587	712	50	-	-	-	-	-	-	-	-	-	-	-
7	Pre-treatment	short-variant	TP53	G154_R156del	459_467delCGGCACCCG	chr17:7578462	667	51	-	-	-	-	-	-	-	-	-	-	-
7	Pre-treatment	copy-number-alteration	CDK6	-	-	-	-	-	7	7 of 7	2.33	amplification	-	-	-	-	-	-	-
7	Pre-treatment	rearrangement	ETV6	-	-	-	-	-	-	-	-	-	ETV6	intergenicRegion	rearrangement	No	chr12:12028277-12028851	chr5:171255275-171255729	86
7	Post-progression	short-variant	RB1	W195*	585G>A	chr13:48923137	608	56	-	-	-	-	-	-	-	-	-	-	-
7	Post-progression	short-variant	CDK12	F89fs*3	264_264delC	chr17:37618587	1027	75	-	-	-	-	-	-	-	-	-	-	-
7	Post-progression	short-variant	TP53	G154_R156del	459_467delCGGCACCCG	chr17:7578462	830	69	-	-	-	-	-	-	-	-	-	-	-
7	Post-progression	copy-number-alteration	EPHA3	-	-	-	-	-	8	17 of 17	1.93	amplification	-	-	-	-	-	-	-
7	Post-progression	copy-number-alteration	RICTOR	-	-	-	-	-	9	39 of 39	2.19	amplification	-	-	-	-	-	-	-
7	Post-progression	copy-number-alteration	CDK6	-	-	-	-	-	12	7 of 7	3.1	amplification	-	-	-	-	-	-	-
7	Post-progression	rearrangement	ETV6	-	-	-	-	-	-	-	-	-	ETV6	N/A	truncation	unknown	chr12:12028275-12028671	chr5:171255275-171255536	149
8	Archival	short-variant	TP53	K291fs*54	871_871delA	chr17:7577066	616	20	-	-	-	-	-	-	-	-	-	-	-
8	Archival	copy-number-alteration	MCL1	-	-	-	-	-	6	5 of 5	1.67	amplification	-	-	-	-	-	-	-
8	Post-progression	short-variant	TP53	K291fs*54	871_871delA	chr17:7577066	707	36	-	-	-	-	-	-	-	-	-	-	-
8	Post-progression	copy-number-alteration	CREBBP	-	-	-	-	-	0	16 of 31	0.56	loss	-	-	-	-	-	-	-
8	Post-progression	copy-number-alteration	MAP2K4	-	-	-	-	-	0	2 of 12	0.54	loss	-	-	-	-	-	-	-
8	Post-progression	copy-number-alteration	AKT2	-	-	-	-	-	7	13 of 13	1.6	amplification	-	-	-	-	-	-	-
8	Post-progression	copy-number-alteration	MCL1	-	-	-	-	-	14	5 of 5	2.83	amplification	-	-	-	-	-	-	-
8	Post-progression	copy-number-alteration	ZNF217	-	-	-	-	-	7	4 of 4	1.59	amplification	-	-	-	-	-	-	-
8	Post-progression	copy-number-alteration	AURKA	-	-	-	-	-	7	8 of 8	1.65	amplification	-	-	-	-	-	-	-
8	Post-progression	copy-number-alteration	GNAS	-	-	-	-	-	7	15 of 15	1.62	amplification	-	-	-	-	-	-	-
8	Post-progression	copy-number-alteration	ARFRP1	-	-	-	-	-	7	6 of 6	1.64	amplification	-	-	-	-	-	-	-
8	Post-progression	rearrangement	NOTCH3	-	-	-	-	-	-	-	-	-	NOTCH3	BRD4	rearrangement	No	chr19:15296002-15296359	chr19:15372312-15372670	47
8	Post-progression	rearrangement	SMARCB1	-	-	-	-	-	-	-	-	-	SMARCB1	intergenicRegion	rearrangement	No	chr22:24176379-24176543	chr22:22004690-22004835	19
9	Archival	short-variant	TP53	R248Q	743G>A	chr17:7577538	522	54	-	-	-	-	-	-	-	-	-	-	-
9	Archival	copy-number-alteration	EMSY	-	-	-	-	-	21	20 of 20	4.44	amplification	-	-	-	-	-	-	-
9	Archival	copy-number-alteration	CCNE1	-	-	-	-	-	7	10 of 10	1.74	amplification	-	-	-	-	-	-	-
9	Archival	copy-number-alteration	AKT2	-	-	-	-	-	10	13 of 13	2.45	amplification	-	-	-	-	-	-	-
9	Archival	copy-number-alteration	PIK3CA	-	-	-	-	-	8	20 of 20	2.01	amplification	-	-	-	-	-	-	-
9	Pre-treatment	short-variant	TP53	R248Q	743G>A	chr17:7577538	504	57	-	-	-	-	-	-	-	-	-	-	-
9	Pre-treatment	copy-number-alteration	EMSY	-	-	-	-	-	17	20 of 20	4.47	amplification	-	-	-	-	-	-	-
9	Pre-treatment	copy-number-alteration	AKT2	-	-	-	-	-	22	13 of 13	5.7	amplification	-	-	-	-	-	-	-
9	Pre-treatment	copy-number-alteration	PIK3CA	-	-	-	-	-	8	20 of 20	2.33	amplification	-	-	-	-	-	-	-
9	Pre-treatment	copy-number-alteration	SOX2	-	-	-	-	-	8	5 of 5	2.43	amplification	-	-	-	-	-	-	-
9	Post-progression	short-variant	TP53	R248Q	743G>A	chr17:7577538	508	45	-	-	-	-	-	-	-	-	-	-	-
9	Post-progression	copy-number-alteration	EMSY	-	-	-	-	-	18	20 of 20	3.78	amplification	-	-	-	-	-	-	-
9	Post-progression	copy-number-alteration	AKT2	-	-	-	-	-	22	13 of 13	4.56	amplification	-	-	-	-	-	-	-
9	Post-progression	copy-number-alteration	PIK3CA	-	-	-	-	-	8	20 of 20	2.03	amplification	-	-	-	-	-	-	-
9	Post-progression	copy-number-alteration	SOX2	-	-	-	-	-	8	5 of 5	2.16	amplification	-	-	-	-	-	-	-
10	Archival	short-variant	TP53	V122fs*26	363_364delTG	chr17:7579322	545	59	-	-	-	-	-	-	-	-	-	-	-
10	Post-progression	short-variant	TP53	V122fs*26	363_364delTG	chr17:7579322	403	31	-	-	-	-	-	-	-	-	-	-	-
10	Post-progression	rearrangement	NF1	-	-	-	-	-	-	-	-	-	NF1	NF1	duplication	No	chr17:29496778-29497047	chr17:29439996-29440295	119
10	Post-progression	rearrangement	PTEN	-	-	-	-	-	-	-	-	-	PTEN	PTEN	duplication	No	chr10:89689265-89689563	chr10:89697903-89698090	14
10	Post-progression	rearrangement	SMARCA4	-	-	-	-	-	-	-	-	-	SMARCA4	GGNBP1	truncation	unknown	chr19:11097546-11097812	chr6:33553337-33553560	13
11	Archival	short-variant	TP53	C277F	830G>T	chr17:7577108	638	89	-	-	-	-	-	-	-	-	-	-	-
11	Archival	rearrangement	CIC	-	-	-	-	-	-	-	-	-	CIC	PRR19	fusion	Yes	chr19:42791724-42791936	chr19:42811430-42811626	46
11	Pre-treatment	short-variant	TP53	C277F	830G>T	chr17:7577108	520	78	-	-	-	-	-	-	-	-	-	-	-
11	Pre-treatment	rearrangement	CIC	-	-	-	-	-	-	-	-	-	CIC	PRR19	fusion	unknown	chr19:42791713-42791929	chr19:42811431-42811650	61
11	Post-progression	short-variant	FAT3	E4259K	12775G>A	chr11:92616397	770	2	-	-	-	-	-	-	-	-	-	-	-
11	Post-progression	short-variant	PDGFRA	E726Q	2176G>C	chr4:55146502	716	2	-	-	-	-	-	-	-	-	-	-	-
11	Post-progression	short-variant	TP53	C277F	830G>T	chr17:7577108	626	60	-	-	-	-	-	-	-	-	-	-	-
11	Post-progression	rearrangement	CIC	-	-	-	-	-	-	-	-	-	CIC	PRR19	truncation	unknown	chr19:42791711-42791944	chr19:42811432-42811707	56
12	Archival	short-variant	TP53	R175H	524G>A	chr17:7578406	497	7	-	-	-	-	-	-	-	-	-	-	-
12	Pre-treatment	short-variant	TP53	R175H	524G>A	chr17:7578406	749	7	-	-	-	-	-	-	-	-	-	-	-
12	Post-progression	short-variant	TP53	R175H	524G>A	chr17:7578406	1082	15	-	-	-	-	-	-	-	-	-	-	-
