# Supplementary material for: Secondary Somatic Mutations Restoring RAD51C and RAD51D Associated with Acquired Resistance to the PARP Inhibitor Rucaparib in High-Grade Ovarian Carcinoma
Source: Oxford University Press journal article supplement (doi:10.1158/2159-8290.cd-17-0419), 2017-06-06
Supplement: 21598290cd170419-sup-182124_1_supp_4061190_jqjj1m.xlsx [file 21598290cd170419-sup-182124_1_supp_4061190_jqjj1m.xlsx]

## Sheet: Supplementary Table 4
gene	position	CN	gene_status	arm_status_80
TNFRSF14	chr1:2491393	2	LOHx	none
MTOR	chr1:11243475	2	LOHx	none
SPEN	chr1:16220230	2	LOHx	none
ARID1A	chr1:27065070	2	LOHx	none
MDM4	chr1:204506715	2	LOHx	none
IKBKE	chr1:206658037	2	LOHx	none
PARP1	chr1:226572385	2	LOHx	none
AKT3	chr1:243834757	2	LOHx	none
ERBB4	chr2:212825808	3	LOHx	none
BARD1	chr2:215633846	3	LOHx	none
NPM1	chr5:170826265	5	gain	none
NSD1	chr5:176642282	5	gain	none
HLA-A	chr6:29911798	3	LOHx	none
NOTCH4	chr6:32177473	3	LOHx	none
DAXX	chr6:33288607	3	LOHx	none
FANCE	chr6:35427229	3	LOHx	none
CCND3	chr6:41906532	2	LOHx	none
PNRC1	chr6:89792264	2	LOHx	none
PRDM1	chr6:106544872	2	LOHx	none
WISP3	chr6:112383157	2	LOHx	none
TNFAIP3	chr6:138197410	3	LOHx	6q_LOHx
ESR1	chr6:152274574	2	LOHx	6q_LOHx
CARD11	chr7:2972236	1	LOH1	none
PMS2	chr7:6030915	1	LOH1	none
INHBA	chr7:41734609	5	gain	none
ZNF703	chr8:37554844	1	LOH1	8p_LOH1
GPR124	chr8:37677329	1	LOH1	8p_LOH1
FGFR1	chr8:38294914	1	LOH1	8p_LOH1
MYST3	chr8:41848108	2		8p_LOH1
MYC	chr8:128750996	7	gain	none
SUFU	chr10:104326920	1	LOH1	none
CYP17A1	chr10:104593788	1	LOH1	none
KDM5A	chr12:446439	5	gain	none
RAD52	chr12:1032384	5	gain	none
MLL2	chr12:49432345	1	LOH1	none
PARP4	chr13:25036585	1	LOH1	13q_LOHx
CDK8	chr13:26903498	1	LOH1	13q_LOHx
FLT3	chr13:28626437	1	LOH1	13q_LOHx
FLT1	chr13:28973157	1	LOH1	13q_LOHx
BRCA2	chr13:32931736	1	LOH1	13q_LOHx
RB1	chr13:48966141	1	LOH1	13q_LOHx
DIS3	chr13:73344939	2	LOHx	13q_LOHx
FGF14	chr13:102714604	3	LOHx	13q_LOHx
IRS2	chr13:110423495	3	LOHx	13q_LOHx
CUL4A	chr13:113890927	3	LOHx	13q_LOHx
PARP2	chr14:20818857	2	LOHx	none
BCL2L2	chr14:23777575	2	LOHx	none
NFKBIA	chr14:35872513	2	LOHx	none
RAD51	chr15:41007157	2	LOHx	none
CBFB	chr16:67097997	1	LOH1	none
CTCF	chr16:67658255	1	LOH1	none
CDH1	chr16:68819339	1	LOH1	none
RPA1	chr17:1766910	2	LOHx	none
TP53	chr17:7572972	2	LOHx	none
ALOX12B	chr17:7983424	2	LOHx	none
AURKB	chr17:8110884	2	LOHx	none
MAP2K4	chr17:11984390	2	LOHx	none
NCOR1	chr17:16016751	2	LOHx	none
RAD51D	chr17:33437450	2	LOHx	17q_LOHx
CDK12	chr17:37652946	2	LOHx	17q_LOHx
ERBB2	chr17:37870380	2	LOHx	17q_LOHx
RARA	chr17:38527232	2	LOHx	17q_LOHx
BRCA1	chr17:41236914	2	LOHx	17q_LOHx
SPOP	chr17:47688968	3	LOHx	17q_LOHx
RNF43	chr17:56462599	3	LOHx	17q_LOHx
RAD51C	chr17:56790799	3	LOHx	17q_LOHx
BRIP1	chr17:59849787	3	LOHx	17q_LOHx
GNA13	chr17:63031542	3	LOHx	17q_LOHx
PRKAR1A	chr17:66519065	3	LOHx	17q_LOHx
RPTOR	chr17:78728794	3	LOHx	17q_LOHx
STK11	chr19:1216779	2	LOHx	none
DOT1L	chr19:2197005	1	LOH1	none
GNA11	chr19:3107913	1	LOH1	none
MAP2K2	chr19:4107238	2	LOHx	none
KEAP1	chr19:10604018	2	LOHx	none
SMARCA4	chr19:11133682	2	LOHx	none
CCNE1	chr19:30309136	5	gain	none
CEBPA	chr19:32053463	5	gain	none
PAK7	chr20:9572542	6	gain	20p_gain
ASXL1	chr20:30985841	6	gain	20p_gain
BACH1	chr21:30713941	1	LOH1	21q_LOHx
RUNX1	chr21:36292830	2	LOHx	21q_LOHx
ERG	chr21:39851496	2	LOHx	21q_LOHx
SOX10	chr22:38374646	2	LOHx	none
EP300	chr22:41531975	2	LOHx	none
